# Supplementary material for: Dual-mode of assembly of anthracene-based imidazolium salts both in non-polar organic solvents and in aqueous solution
Source: Royal Society of Chemistry journal article supplement (doi:10.1039/c1cc12431e), 2011-01-01
Supplement: c1cc12431e.pdf [file c1cc12431e.pdf]

## Supplementary Information

Dual-mode of assembly of anthracene-based imidazolium salts both in  
non-polar organic solvents and in aqueous solution

*Shigeo Kohmoto,\* Ryota Tsuyuki, Yujiro Hara, Akira Kaji, Masahiro Takahashi and  
Keiki Kishikawa*

Department of Applied Chemistry and Biotechnology, Graduate School of Engineering,  
Chiba University, 1-33 Yayoi-cho, Inage-ku, Chiba 263-8522, Japan

e-mail: kohmoto@faculty.chiba-u.jp

**Synthesis of 1,1'-(anthracene-9,10-diylbis(methylene))bis(3-(3,4,5-tris(octyloxy)-benzyl)-1*H*-imidazolium) dichloride (**1**).**

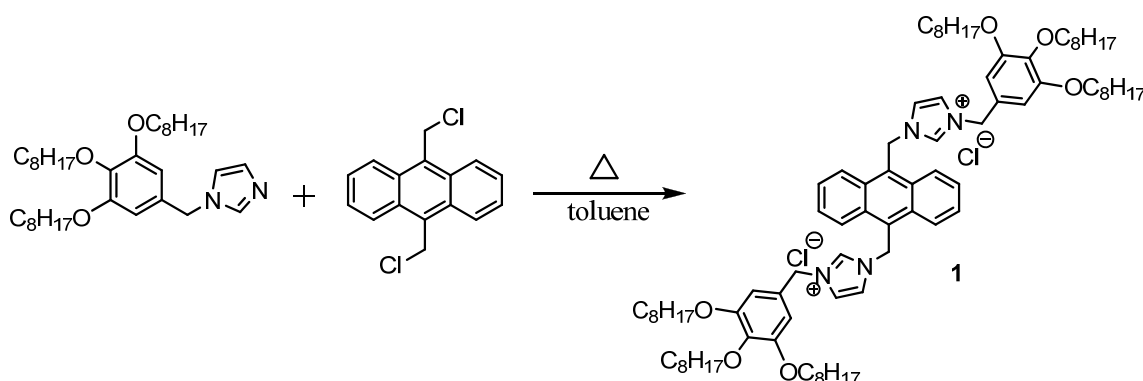

A solution of 1-(3,4,5-tris(octyloxy)benzyl)imidazole (0.470 g, 0.919 mmol) and 9,10-bis(chloromethyl)anthracene (0.126 g, 0.460 mmol) in toluene (20 ml) was refluxed for 3 days under stirring. The solvent was removed in vacuo and the crude product was purified by silica gel chromatography (eluent:  $\text{CHCl}_3/\text{MeOH} = 95/5$  to  $4/1$ ) to obtain 0.362 g (61 %) of **1** as a yellow solid. Mp. 204.3–208.1 °C;  $^1\text{H}$  NMR (395.75 MHz,  $\text{CDCl}_3$ ):  $\delta$  0.88 (t,  $J = 6.8$  Hz, 18H), 1.28–1.47 (m, 60H), 1.65–1.79 (m, 12H), 3.76 (t,  $J = 6.3$  Hz, 8H), 3.87 (t,  $J = 6.5$  Hz, 4H), 5.04 (s, 4H), 6.28 (s, 4H), 6.62 (s, 4H), 6.89 (s, 2H), 7.25 (m, 4H), 7.85 (m, 4H), 8.87 (s, 2H), 9.54 (s, 2H);  $^{13}\text{C}$  NMR (99.45 MHz,  $\text{CDCl}_3$ ):  $\delta$  14.12, 22.70, 26.11, 29.40, 30.30, 31.91, 46.25, 53.32, 69.29, 73.43, 107.40, 120.53, 123.38, 124.44, 127.43, 127.60, 130.11, 136.59, 138.83, 153.60; HRMS(ESI)  $m/z$ , calcd for  $\text{C}_{84}\text{H}_{128}\text{ClN}_4\text{O}_6$  [ $\text{M} - \text{Cl}$ ] $^+$  1323.9517, found 1323.9498, calcd for  $\text{C}_{84}\text{H}_{128}\text{N}_4\text{O}_6$  [ $\text{M} - 2\text{Cl}$ ] $^{2+}$  644.4911, found 644.4903.

**Synthesis of 1,1'-(anthracene-9,10-diylbis(methylene))bis(3-(3,4,5-tris(octyloxy)-benzyl)-1*H*-imidazolium) dihexafluorophosphate (2).**

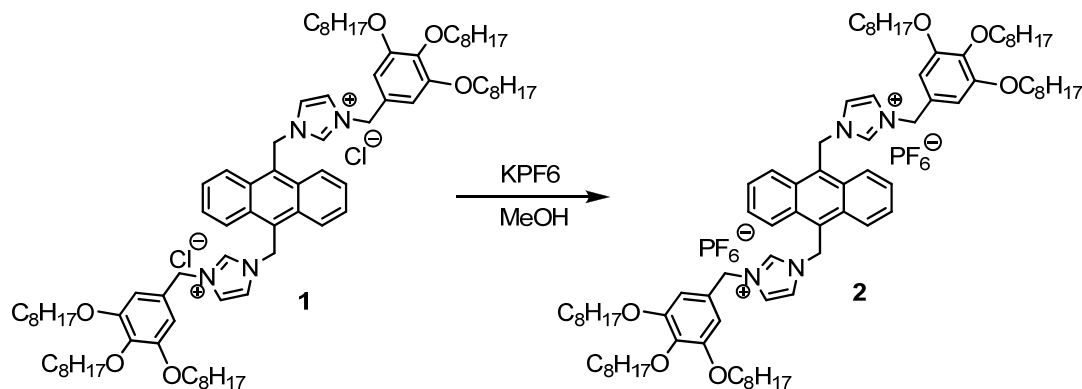

A solution of **1** (0.200 g, 1.09 mmol) and KPF<sub>6</sub> (0.412 g, 2.29 mmol) in MeOH (10 mL) was stirred at ambient temperature for 1 day. The solvent was removed in vacuo and dissolved in n-hexane. After filtration, the solvent was evaporated to obtain a yellow solid. The crude product was purified by silica gel chromatography (eluent: CHCl<sub>3</sub>/MeOH = 95/5 to 4/1) to obtain 0.362 g (61 %) of **2**. Mp. 119.0–123.6 °C; <sup>1</sup>H NMR (395.75 MHz, CDCl<sub>3</sub>): δ 0.88 (t, *J* = 6.8, 18H), 1.28–1.47 (m, 60H), 1.69–1.77 (m, 12H), 3.90 (m, 12H), 4.96 (s, 4H), 6.00 (s, 4H), 6.43 (s, 4H), 6.99 (s, 2H), 7.33 (s, 2H), 7.39 (m, 4H), 7.86 (m, 4H), 8.28 (s, 2H); <sup>13</sup>C NMR (99.45 MHz, CDCl<sub>3</sub>): δ 14.08, 22.66, 26.07, 29.36, 30.31, 31.89, 45.59, 53.95, 69.17, 73.42, 107.30, 121.77, 122.81, 123.12, 124.29, 126.81, 128.05, 130.24, 134.65, 138.89, 153.78; HRMS(ESI) *m/z*, calcd for C<sub>84</sub>H<sub>128</sub>F<sub>6</sub>N<sub>4</sub>O<sub>6</sub>P [M – PF<sub>6</sub>]<sup>+</sup> 1433.9470, found 1433.9440, calcd for C<sub>84</sub>H<sub>128</sub>N<sub>4</sub>O<sub>6</sub> [M – 2PF<sub>6</sub>]<sup>2+</sup> 644.4911, found 644.4897.

<sup>1</sup>H NMR (500 MHz, CDCl<sub>3</sub>) spectrum of **1**

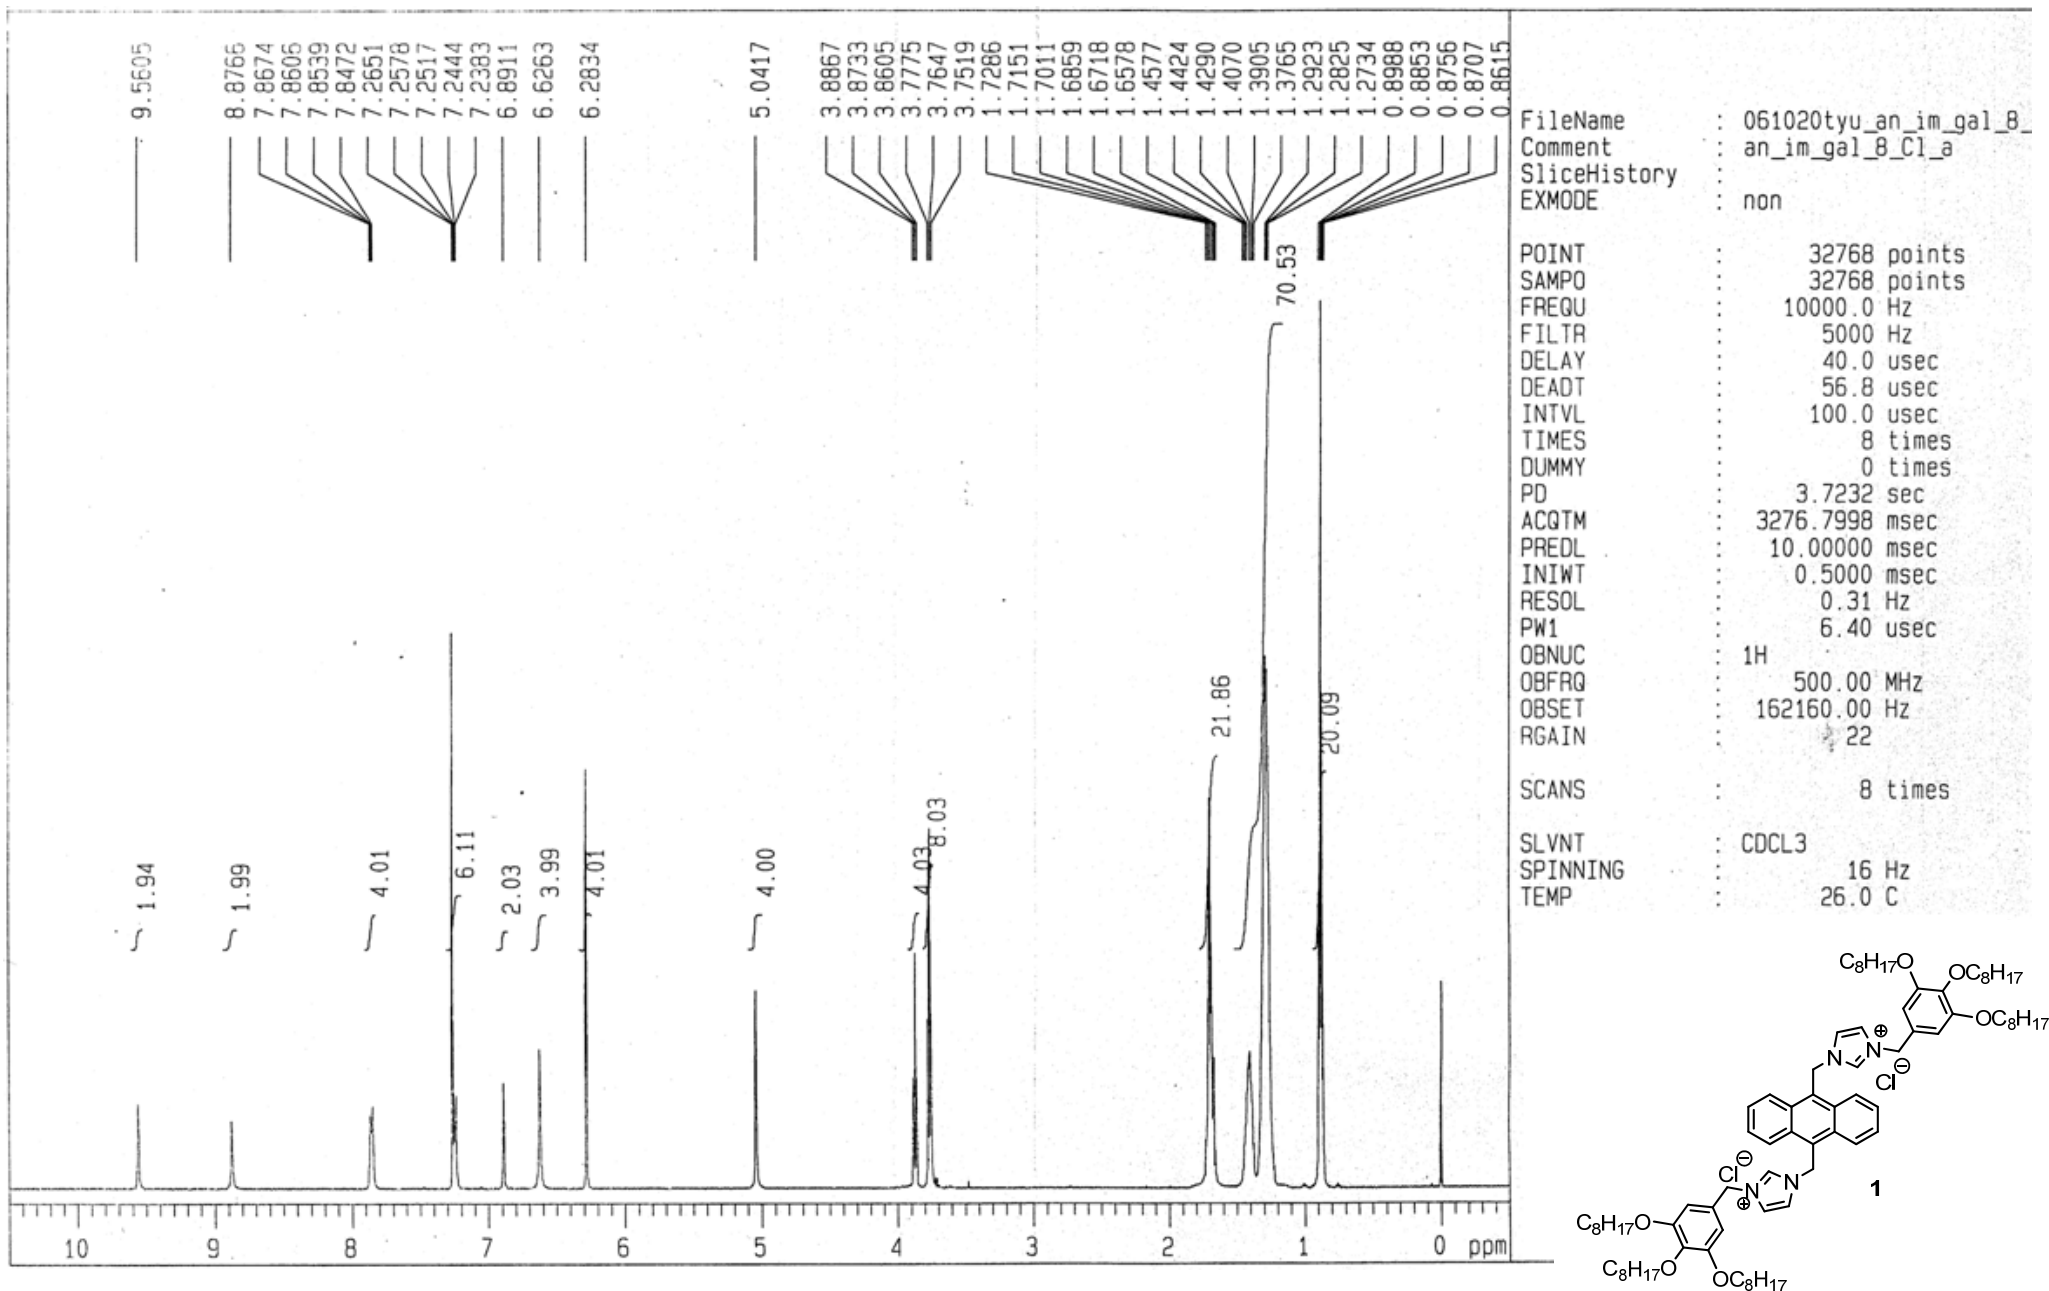

$^{13}\text{C}$  NMR (99.45 MHz,  $\text{CDCl}_3$ ) spectrum of **1**

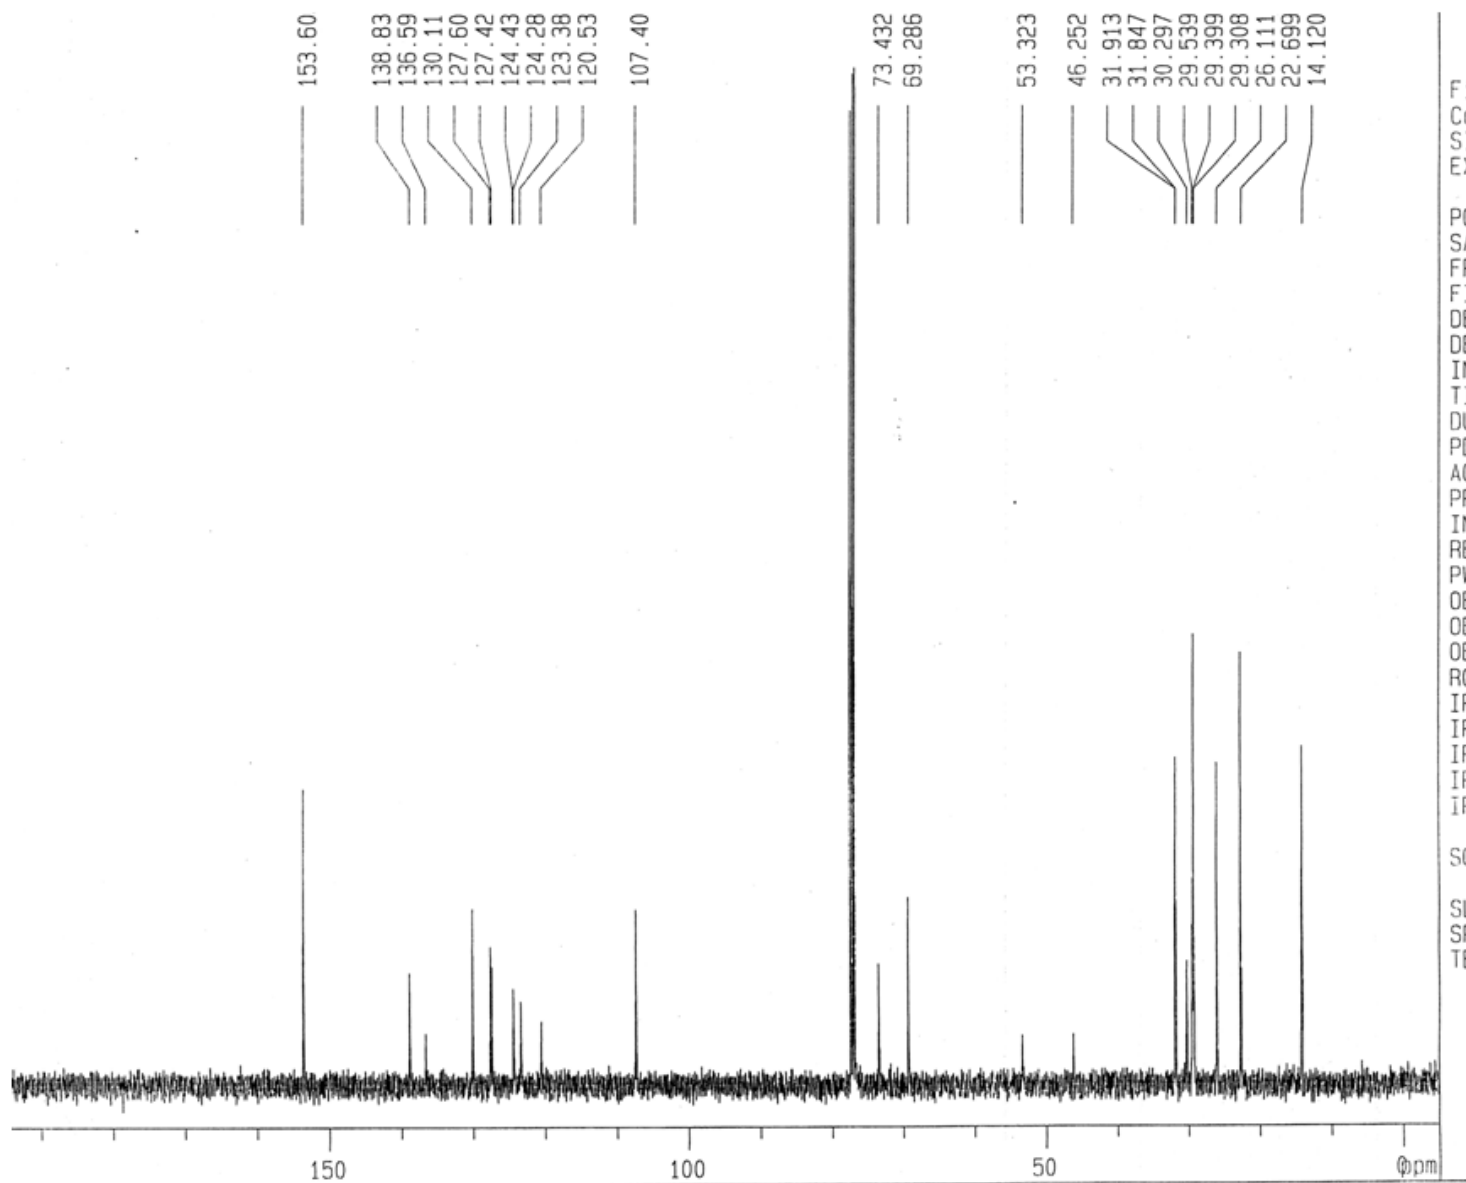

FileName : 060727tyu\_bcm\_an\_im  
Comment : bcm\_an\_im\_gal\_8\_cl  
SliceHistory :  
EXMODE : bcm

POINT : 32768 points  
SAMPO : 32768 points  
FREQU : 26881.7 Hz  
FILTR : 13450 Hz  
DELAY : 14.9 usec  
DEADT : 19.8 usec  
INTVL : 37.2 usec  
TIMES : 512 times  
DUMMY : 1 times  
PD : 1.7810 sec  
ACQTM : 1218.9696 msec  
PREDL : 10.0000 msec  
INIWT : 10.0000 msec  
RESOL : 0.82 Hz  
PW1 : 5.00 usec  
OBNUC :  $^{13}\text{C}$   
OBFRQ : 99.45 MHz  
OBSET : 104750.00 Hz  
RGAIN : 28  
IRNUC :  $^1\text{H}$   
IRFRQ : 395.75 MHz  
IRSET : 134498.00 Hz  
IRRPW : 40.0 usec  
IRRNS : 0

SCANS : 512 times

SLVNT :  $\text{CDCl}_3$   
SPINNING : 12 Hz  
TEMP : 26.1 C

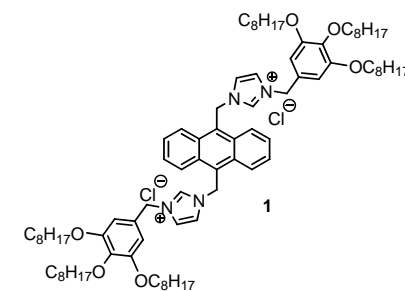

<sup>1</sup>H NMR (395.75 MHz, CDCl<sub>3</sub>) spectrum of **2**

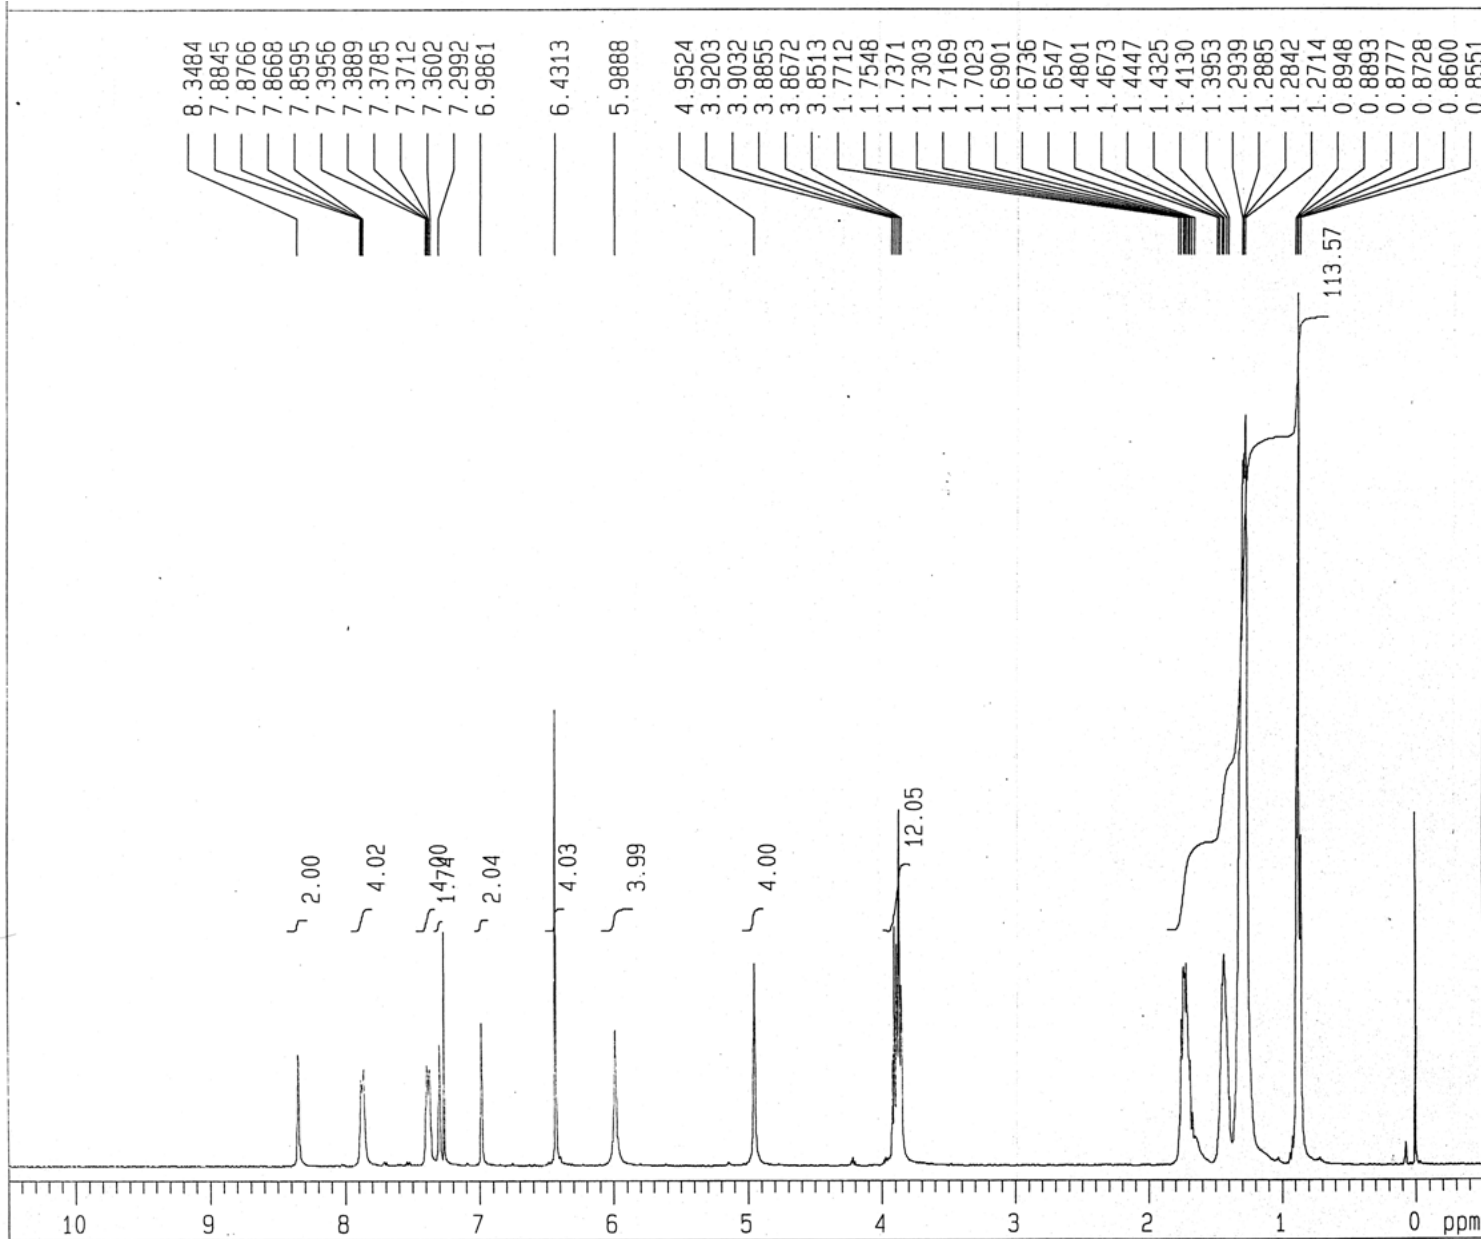

FileName : 060829tyu\_an\_im\_gal  
Comment : an\_im\_gal\_8\_PF6  
SliceHistory :  
EXMODE : non  
POINT : 32768 points  
SAMPO : 32768 points  
FREQU : 7917.7 Hz  
FILTR : 3950 Hz  
DELAY : 50.6 usec  
DEADT : 72.8 usec  
INTVL : 126.3 usec  
TIMES : 8 times  
DUMMY : 0 times  
PD : 2.8614 sec  
ACQTM : 4138.5986 msec  
PREDL : 10.0000 msec  
INIWT : 0.5000 msec  
RESOL : 0.24 Hz  
PW1 : 6.25 usec  
OBNUC : 1H  
OBFRQ : 395.75 MHz  
OBSET : 134498.00 Hz  
RGAIN : 17  
SCANS : 8 times  
SLVNT : CDCL3  
SPINNING : 12 Hz  
TEMP : 22.7 C

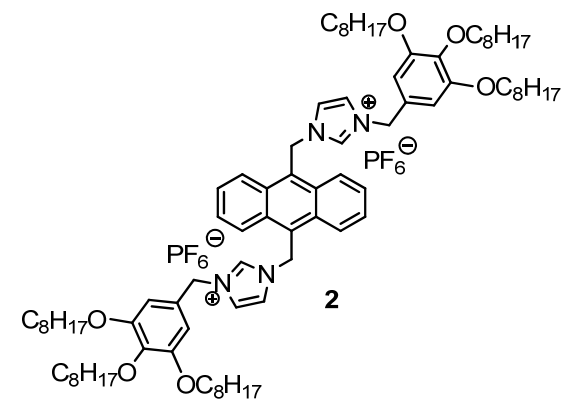

$^{13}\text{C}$  NMR (99.45 MHz,  $\text{CDCl}_3$ ) spectrum of **1**

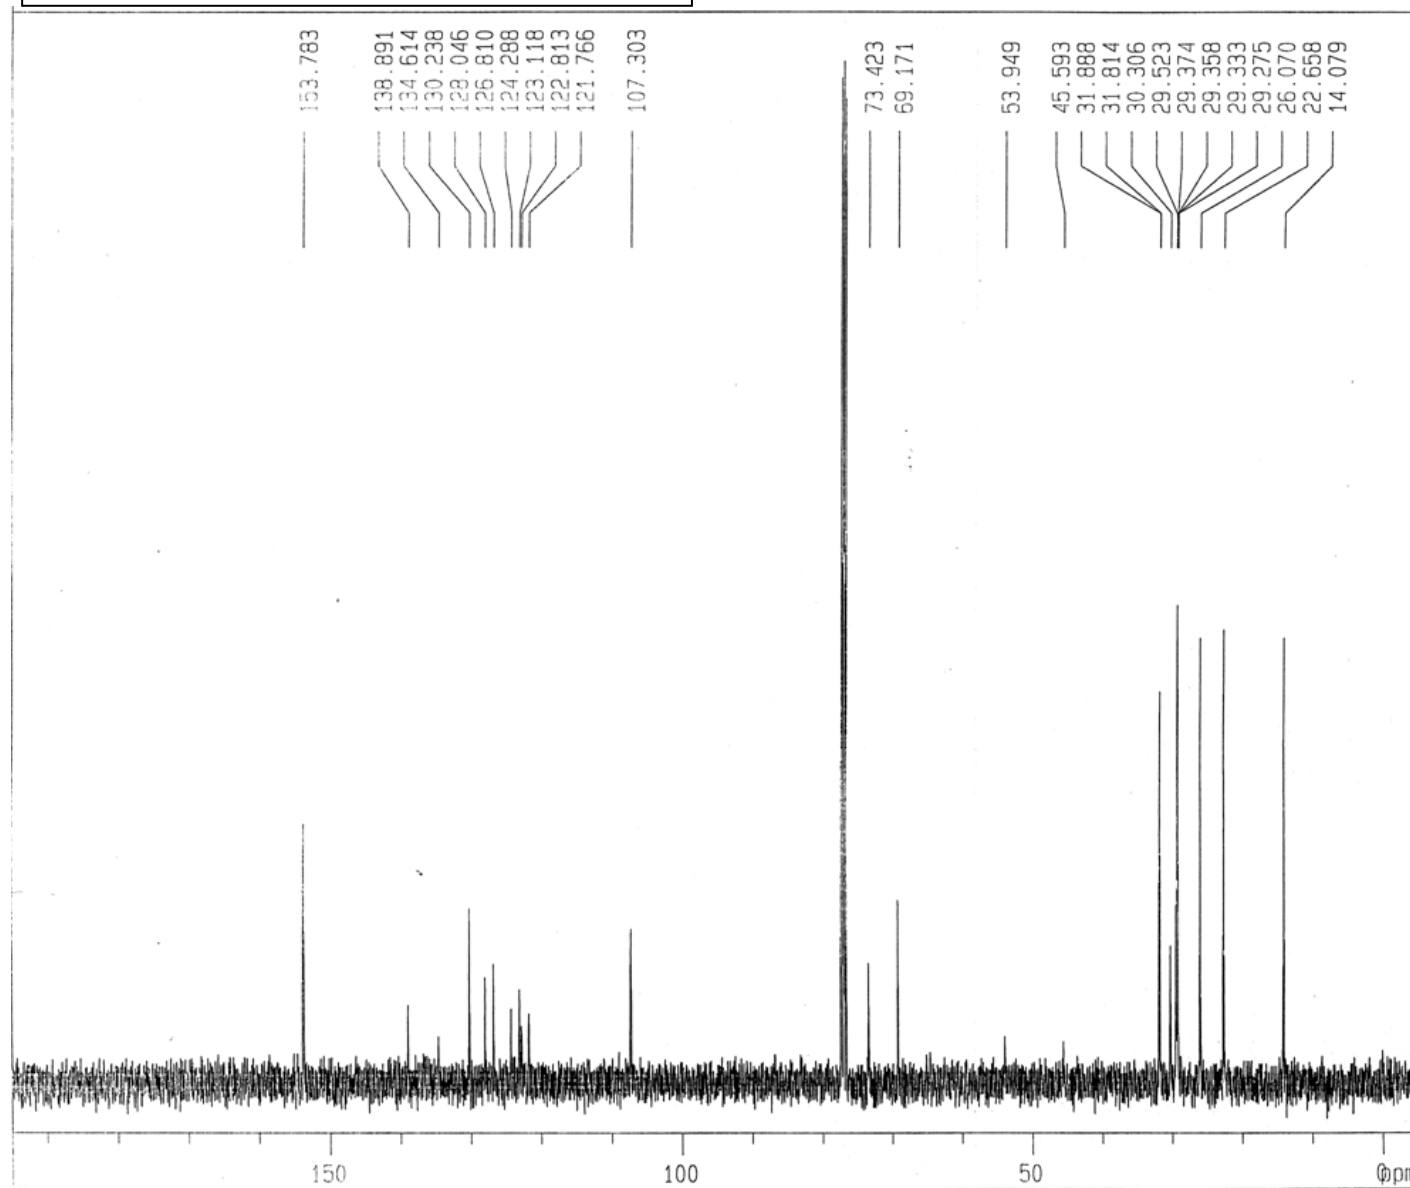

FileName : 060829tyu\_bcm\_an\_im\_gal  
Comment : bcm\_an\_im\_gal\_8\_PF6  
SliceHistory :  
EXMODE : bcm

POINT : 32768 points  
SAMPO : 32768 points  
FREQU : 26881.7 Hz  
FILTR : 13450 Hz  
DELAY : 14.9 usec  
DEADT : 19.8 usec  
INTVL : 37.2 usec  
TIMES : 256 times  
DUMMY : 1 times  
PD : 1.7810 sec  
ACQTM : 1218.9696 msec  
PREDL : 10.00000 msec  
INIWT : 10.0000 msec  
RESOL : 0.82 Hz  
PW1 : 5.00 usec  
OBNUC :  $^{13}\text{C}$   
OBFRQ : 99.45 MHz  
OBSET : 104750.00 Hz  
RGAIN : 29  
IRNUC :  $^1\text{H}$   
IRFRQ : 395.75 MHz  
IRSET : 134498.00 Hz  
IRRPW : 40.0 usec  
IRRNS : 0

SCANS : 256 times

SLVNT :  $\text{CDCl}_3$   
SPINNING : 13 Hz  
TEMP : 23.6 C

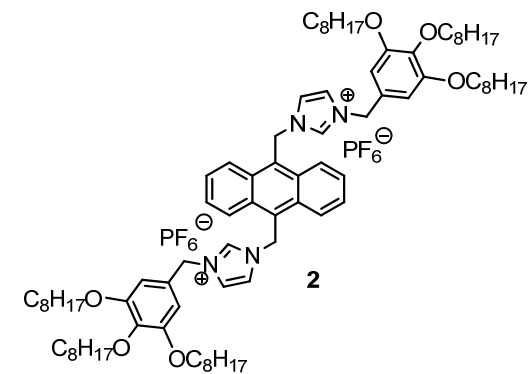

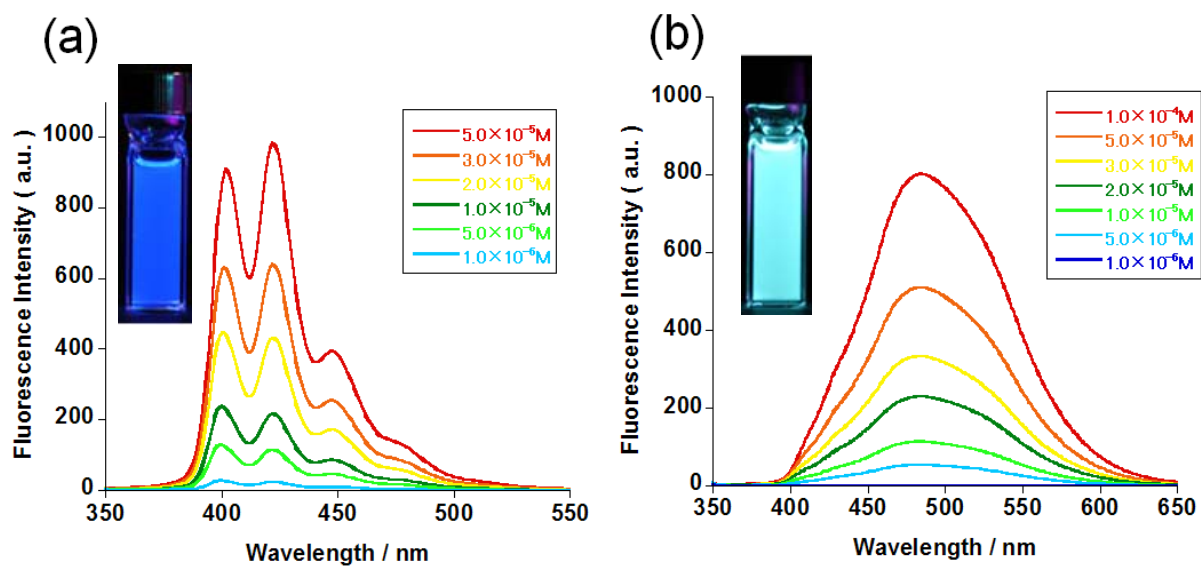

**Figure S1.** Fluorescence spectra of **2** in EtOH (a) and in hexane (b).  $\lambda_{\text{ex}}$  342 nm. The inset photographs show the color of fluorescence at concentration  $5.0 \times 10^{-5}$  M with  $\lambda_{\text{ex}}$  365 nm.

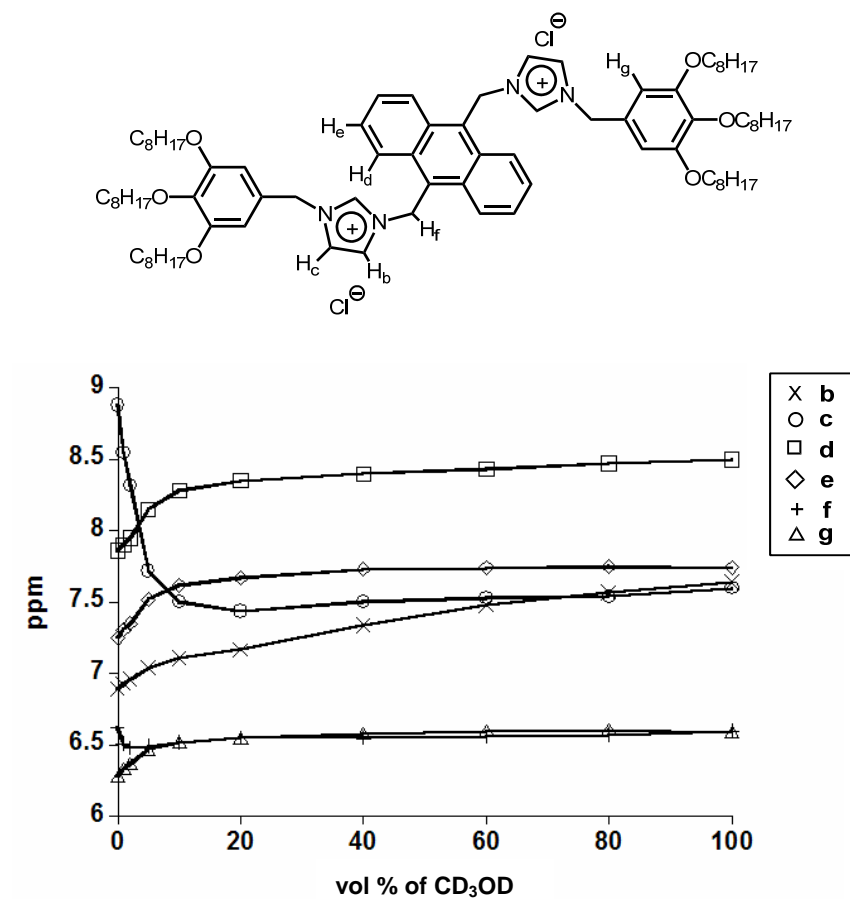

**Fig. S2.** Solvent-polarity-dependent chemical shift of compound **1** in CDCl<sub>3</sub>/CD<sub>3</sub>OD at ca. 25°C (concentration ca. 7.0 × 10<sup>-3</sup> M).



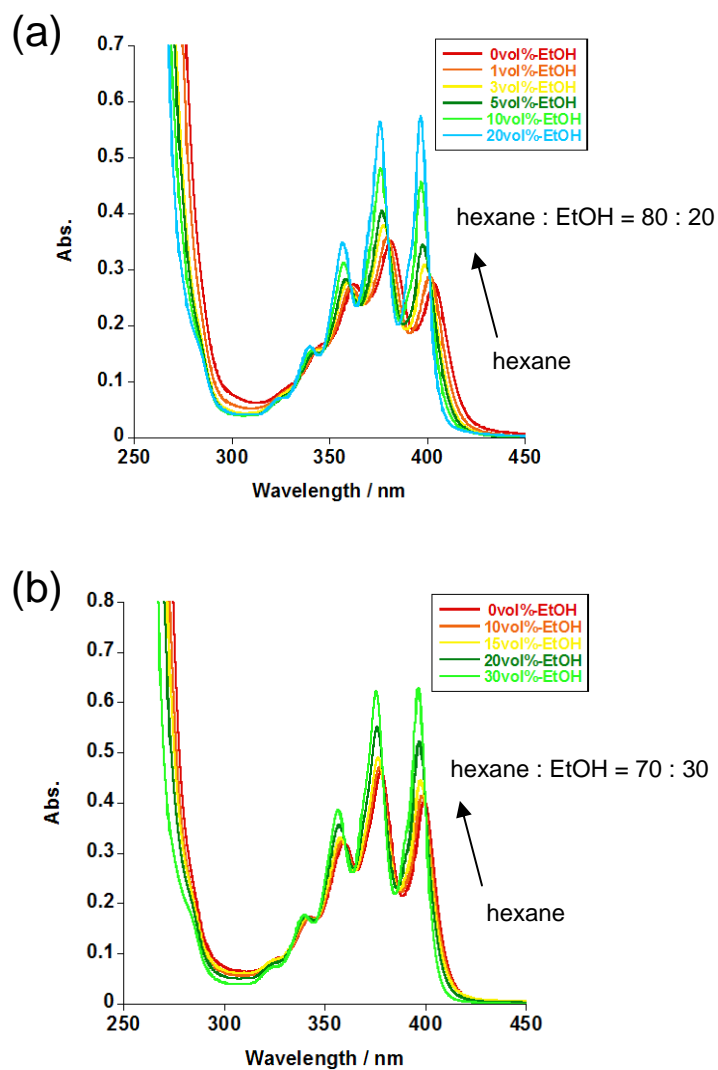

**Fig. S3.** Solvent-polarity-dependent uv-vis spectra of **1** (a) and **2** (b) in hexane with varying amount of ethanol.
